# Supplementary material for: Beta-Glucan from S. cerevisiae Protected AOM-Induced Colon Cancer in cGAS-Deficient Mice Partly through Dectin-1-Manipulated Macrophage Cell Energy
Source: MDPI journal article supplement (doi:10.3390/ijms231810951), 2022-09-19
Supplement: s1 [file s1]

**Table S1.** The exact p values of the figure with significant statistical analysis are demonstrated.

|                          | WT vs. cGAS <sup>-/-</sup> | WT+S. cerevisiae vs. cGAS <sup>-/-</sup> | cGAS <sup>-/-</sup> +S. cerevisiae vs. cGAS <sup>-/-</sup> |
|--------------------------|----------------------------|------------------------------------------|------------------------------------------------------------|
| Fig 1C                   | 0.0132                     | 0.0132                                   | 0.0132                                                     |
| Fig 1D                   | 0.0129                     | 0.0129                                   | 0.0129                                                     |
|                          |                            |                                          |                                                            |
| Fig 2G Rikennellaceae    | 0.003                      | 0.0016                                   | 0.0043                                                     |
| Fig 2G Turicibacteraceae | 0.0014                     | 0.0089                                   | 0.0015                                                     |
|                          | Control vs yeast extract   | Control vs WGP                           |                                                            |
| Fig 3B                   | 0.0008                     | 0.0002                                   |                                                            |
| Fig 3C                   | 0.0315                     | 0.0271                                   |                                                            |
| Fig 3D                   | 0.0314                     | 0.011                                    |                                                            |
|                          |                            |                                          |                                                            |
